# Supplementary material
Source: PubMed Central journal article supplement (PMC2729087)
Supplement: NIHMS126015-supplement-supplement_1.pdf [file NIHMS126015-supplement-supplement_1.pdf]

## ONLINE SUPPLEMENTARY TABLES

**Supplemental table 1.** Correlation coefficients of total IgE, food-specific and aeroallergen-specific IgE between parents and index child.

|                           | Father-Mother |         | Father-Index |         | Mother-Index |         | Index child-other siblings |         |
|---------------------------|---------------|---------|--------------|---------|--------------|---------|----------------------------|---------|
|                           | $\rho$        | $p$     | $\rho$       | $p$     | $\rho$       | $p$     | $\rho$                     | $p$     |
| Total IgE, kU/L           | 0.02          | 0.75    | 0.27         | < 0.001 | 0.25         | < 0.001 | 0.34                       | < 0.001 |
| Food-specific IgE         |               |         |              |         |              |         |                            |         |
| Sesame                    | 0.14          | 0.01    | 0.23         | < 0.001 | 0.23         | < 0.001 | 0.33                       | < 0.001 |
| Peanut                    | 0.05          | 0.39    | 0.11         | 0.006   | 0.14         | < 0.001 | 0.15                       | 0.002   |
| Wheat                     | 0.17          | 0.005   | 0.21         | < 0.001 | 0.25         | < 0.001 | 0.31                       | < 0.001 |
| Milk                      | 0.12          | 0.05    | 0.17         | < 0.001 | 0.12         | < 0.001 | 0.19                       | < 0.001 |
| Egg white                 | 0.17          | 0.003   | 0.15         | < 0.001 | 0.16         | < 0.001 | 0.22                       | < 0.001 |
| Soy                       | 0.23          | < 0.001 | 0.23         | < 0.001 | 0.25         | < 0.001 | 0.24                       | < 0.001 |
| Walnut                    | 0.01          | 0.89    | 0.08         | 0.08    | 0.17         | < 0.001 | 0.26                       | < 0.001 |
| Shrimp                    | 0.06          | 0.33    | 0.12         | 0.004   | 0.18         | < 0.001 | 0.25                       | < 0.001 |
| Cod fish                  | 0.16          | 0.007   | 0.15         | < 0.001 | 0.20         | < 0.001 | 0.17                       | < 0.001 |
| Aeroallergen-specific IgE |               |         |              |         |              |         |                            |         |
| D pteronyssinus           | 0.03          | 0.65    | 0.16         | < 0.001 | 0.10         | 0.003   | 0.27                       | < 0.001 |
| D farinae                 | 0.01          | 0.86    | 0.19         | < 0.001 | 0.11         | < 0.001 | 0.24                       | < 0.001 |
| Cat                       | 0.12          | 0.03    | 0.19         | < 0.001 | 0.17         | < 0.001 | 0.26                       | < 0.001 |
| Dog                       | 0.08          | 0.17    | 0.20         | < 0.001 | 0.15         | < 0.001 | 0.26                       | < 0.001 |
| Cockroach                 | 0.13          | 0.03    | 0.21         | < 0.001 | 0.20         | < 0.001 | 0.23                       | < 0.001 |
| Alternaria                | 0.21          | < 0.001 | 0.27         | < 0.001 | 0.29         | < 0.001 | 0.38                       | < 0.001 |

**Supplement table 2a.** Inter-relationship of total IgE and specific IgE among parents, index child, and other siblings in 482 families with at least one food allergic member.

| Allergen                  | Father-Offspring <sup>a,b</sup> |      |          | Mother-Offspring <sup>c</sup> |      |          | Index-Other siblings <sup>d</sup> |      |          |
|---------------------------|---------------------------------|------|----------|-------------------------------|------|----------|-----------------------------------|------|----------|
|                           | $\beta$                         | se   | <i>p</i> | $\beta$                       | se   | <i>p</i> | $\beta$                           | se   | <i>p</i> |
| Total IgE                 | 0.34                            | 0.06 | < 0.001  | 0.24                          | 0.04 | < 0.001  | 0.30                              | 0.05 | < 0.001  |
| Food-specific IgE         |                                 |      |          |                               |      |          |                                   |      |          |
| Sesame                    | 0.34                            | 0.08 | < 0.001  | 0.15                          | 0.08 | 0.05     | 0.30                              | 0.06 | < 0.001  |
| Peanut                    | 0.20                            | 0.08 | 0.009    | 0.19                          | 0.06 | 0.002    | 0.10                              | 0.06 | 0.06     |
| Wheat                     | 0.38                            | 0.07 | < 0.001  | 0.32                          | 0.06 | < 0.001  | 0.24                              | 0.05 | < 0.001  |
| Milk                      | 0.36                            | 0.08 | < 0.001  | 0.11                          | 0.08 | 0.16     | 0.11                              | 0.06 | 0.06     |
| Egg white                 | 0.34                            | 0.09 | < 0.001  | 0.28                          | 0.08 | < 0.001  | 0.15                              | 0.05 | 0.005    |
| Soy                       | 0.35                            | 0.07 | < 0.001  | 0.34                          | 0.06 | < 0.001  | 0.19                              | 0.06 | < 0.001  |
| Walnut                    | 0.20                            | 0.07 | 0.006    | 0.27                          | 0.07 | < 0.001  | 0.33                              | 0.06 | < 0.001  |
| Shrimp                    | 0.14                            | 0.05 | 0.005    | 0.23                          | 0.04 | < 0.001  | 0.26                              | 0.06 | < 0.001  |
| Cod fish                  | 0.15                            | 0.07 | 0.04     | 0.48                          | 0.10 | < 0.001  | 0.17                              | 0.08 | 0.04     |
| Aeroallergen-specific IgE |                                 |      |          |                               |      |          |                                   |      |          |
| <i>D pteronyssinus</i>    | 0.18                            | 0.04 | < 0.001  | 0.09                          | 0.03 | 0.008    | 0.23                              | 0.05 | < 0.001  |
| <i>D farinae</i>          | 0.19                            | 0.04 | < 0.001  | 0.10                          | 0.03 | 0.003    | 0.20                              | 0.05 | < 0.001  |
| Cat                       | 0.25                            | 0.05 | < 0.001  | 0.15                          | 0.04 | < 0.001  | 0.27                              | 0.05 | < 0.001  |
| Dog                       | 0.32                            | 0.06 | < 0.001  | 0.18                          | 0.04 | < 0.001  | 0.22                              | 0.05 | < 0.001  |
| Cockroach                 | 0.27                            | 0.05 | < 0.001  | 0.23                          | 0.04 | < 0.001  | 0.24                              | 0.06 | < 0.001  |
| Alternaria                | 0.17                            | 0.05 | < 0.001  | 0.20                          | 0.04 | < 0.001  | 0.37                              | 0.06 | < 0.001  |

**Supplement table 2b.** Inter-relationship of total IgE and specific IgE among parents, index child, and other siblings in 99 families without a food allergic member.

| Allergen                  | Father-Offspring <sup>a,b</sup> |      |          | Mother-Offspring <sup>c</sup> |      |          | Index-Other siblings <sup>d</sup> |      |          |
|---------------------------|---------------------------------|------|----------|-------------------------------|------|----------|-----------------------------------|------|----------|
|                           | $\beta$                         | se   | <i>p</i> | $\beta$                       | se   | <i>p</i> | $\beta$                           | se   | <i>p</i> |
| Total IgE                 | -0.25                           | 0.19 | 0.18     | 0.15                          | 0.07 | 0.04     | 0.23                              | 0.10 | 0.02     |
| Food-specific IgE         |                                 |      |          |                               |      |          |                                   |      |          |
| Sesame                    | 0.45                            | 0.20 | 0.02     | 0.38                          | 0.13 | 0.004    | 0.74                              | 0.18 | < 0.001  |
| Peanut                    | -0.36                           | 0.16 | 0.02     | 0.10                          | 0.11 | 0.38     | 0.29                              | 0.13 | 0.02     |
| Wheat                     | -0.15                           | 0.19 | 0.42     | 0.29                          | 0.10 | 0.006    | 0.35                              | 0.11 | 0.002    |
| Milk                      | -0.03                           | 0.15 | 0.87     | 0.33                          | 0.11 | 0.003    | 0.22                              | 0.08 | 0.006    |
| Egg white                 | -0.11                           | 0.24 | 0.65     | 0.15                          | 0.12 | 0.22     | 0.17                              | 0.10 | 0.07     |
| Soy                       | -0.01                           | 0.18 | 0.95     | 0.16                          | 0.11 | 0.13     | 0.44                              | 0.12 | < 0.001  |
| Walnut                    | -0.18                           | 0.16 | 0.26     | 0.16                          | 0.11 | 0.17     | 0.28                              | 0.15 | 0.05     |
| Shrimp                    | 0.16                            | 0.14 | 0.24     | 0.13                          | 0.08 | 0.08     | 0.18                              | 0.10 | 0.06     |
| Cod fish                  | -0.04                           | 0.11 | 0.74     | 0.40                          | 0.11 | < 0.001  | 0.33                              | 0.12 | 0.007    |
| Aeroallergen-specific IgE |                                 |      |          |                               |      |          |                                   |      |          |
| <i>D pteronyssinus</i>    | 0.14                            | 0.15 | 0.36     | 0.14                          | 0.07 | 0.05     | 0.21                              | 0.11 | 0.04     |
| <i>D farinae</i>          | 0.13                            | 0.15 | 0.38     | 0.04                          | 0.07 | 0.61     | 0.28                              | 0.11 | 0.009    |
| Cat                       | 0.04                            | 0.19 | 0.83     | 0.13                          | 0.08 | 0.10     | 0.35                              | 0.14 | 0.02     |
| Dog                       | -0.13                           | 0.17 | 0.42     | 0.21                          | 0.08 | 0.008    | 0.37                              | 0.12 | 0.002    |
| Cockroach                 | -0.15                           | 0.14 | 0.27     | 0.20                          | 0.07 | 0.002    | 0.16                              | 0.11 | 0.16     |
| Alternaria                | 0.24                            | 0.31 | 0.44     | 0.39                          | 0.11 | 0.001    | 0.30                              | 0.11 | 0.008    |

Note:

<sup>a</sup> Linear regression was performed with adjusting covariates: age, sex, ethnicity and birth order.<sup>b</sup> Offspring's IgE is outcome variable as father's IgE is predictor<sup>c</sup> Offspring's IgE is outcome variable as mother's IgE is predictor<sup>d</sup> Other sibling's IgE is outcome variable as index child's IgE is predictor

**Supplement table 3.** Heritability estimates for total IgE and specific IgE, stratified by families with and without a food allergic member <sup>a</sup>.

|                        | Families with at least one food-allergic member (N=482) |          | Families without a food-allergic member (N=99) |          |
|------------------------|---------------------------------------------------------|----------|------------------------------------------------|----------|
|                        | $\hat{h}^2$ (SE)                                        | <i>P</i> | $\hat{h}^2$ (SE)                               | <i>P</i> |
| Total IgE              | 0.48 (0.05)                                             | < 0.001  | 0.47 (0.15)                                    | < 0.001  |
| Food-specific IgE      |                                                         |          |                                                |          |
| Sesame                 | 0.22 (0.05)                                             | < 0.001  | 0.43 (0.12)                                    | < 0.001  |
| Peanut                 | 0.10 (0.05)                                             | 0.01     | 0.17 (0.12)                                    | 0.06     |
| Wheat                  | 0.32 (0.05)                                             | < 0.001  | 0.34 (0.12)                                    | 0.001    |
| Milk                   | 0.11 (0.05)                                             | < 0.001  | 0.32 (0.12)                                    | 0.003    |
| Egg white              | 0.17 (0.05)                                             | < 0.001  | 0.27 (0.14)                                    | 0.02     |
| Soy                    | 0.30 (0.05)                                             | < 0.001  | 0.36 (0.12)                                    | < 0.001  |
| Walnut                 | 0.24 (0.05)                                             | < 0.001  | 0.21 (0.13)                                    | 0.04     |
| Shrimp                 | 0.30 (0.05)                                             | < 0.001  | 0.28 (0.12)                                    | 0.007    |
| Cod fish               | 0.17 (0.05)                                             | < 0.001  | 0.51 (0.13)                                    | < 0.001  |
| Aeroallergen           |                                                         |          |                                                |          |
| <i>D pteronyssinus</i> | 0.21 (0.05)                                             | < 0.001  | 0.33 (0.14)                                    | 0.005    |
| <i>D farinae</i>       | 0.23 (0.05)                                             | < 0.001  | 0.20 (0.13)                                    | 0.05     |
| Cat                    | 0.32 (0.05)                                             | < 0.001  | 0.21 (0.12)                                    | 0.03     |
| Dog                    | 0.29 (0.05)                                             | < 0.001  | 0.33 (0.13)                                    | 0.003    |
| Cockroach              | 0.36 (0.05)                                             | < 0.001  | 0.25 (0.12)                                    | 0.02     |
| Alternaria             | 0.36 (0.05)                                             | < 0.001  | 0.36 (0.11)                                    | < 0.001  |

Note:

<sup>a</sup> Variance component analysis was performed with adjusting covariates: age, sex and ethnicity.
